# Supplementary material for: Mesoporous maltose/calcium oxalate hybrid material with abundant reaction sites and its efficient Pb(ii) removal from diverse water bodies
Source: Royal Society of Chemistry journal article supplement (doi:10.1039/d2nj01092e), 2022-01-01
Supplement: d2nj01092e1.pdf [file d2nj01092e1.pdf]

## Electronic Supplementary Information

### **Mesoporous maltose/calcium oxalate hybrid material with abundant reaction sites and its efficient removal of Pb (II) from diverse water bodies**

Xinxin Chen, Xia Zhang<sup>\*</sup>, Fei Li, Xitong Yang, Mengmeng Du, Jing Fan<sup>\*</sup>

*School of Environment, Henan Key Laboratory for Environmental Pollution Control, Key Laboratory for Yellow River and Huai River Water Environment and Pollution Control, Ministry of Education, Henan Normal University, Xinxiang 453007, PR China*

<sup>\*</sup>Corresponding author: Tel.: +86-373-3325719

*E-mail address:* fanjing@htu.cn (J. Fan), zhangxia27@126.com (X. Zhang)

1. Tables S1-S2

Table S1 Parameters of Ma-COM

| Sample | BET surface area ( $\text{m}^2 \text{g}^{-1}$ ) | Mean pore diameter(nm) | Pore volume ( $\text{cm}^3 \text{g}^{-1}$ ) |
|--------|-------------------------------------------------|------------------------|---------------------------------------------|
| Ma-COM | 23.428                                          | 32.84                  | 0.191                                       |

Table S2 Thermodynamic parameters of Pb(II) adsorption on Ma-COM

| T (K) | $\Delta G^0$ ( $\text{KJ mol}^{-1}$ ) | $\Delta H^0$ ( $\text{KJ mol}^{-1}$ ) | $\Delta S^0$ ( $\text{J mol}^{-1} \text{K}^{-1}$ ) |
|-------|---------------------------------------|---------------------------------------|----------------------------------------------------|
| 298   | -5.524                                |                                       |                                                    |
| 308   | -5.254                                |                                       |                                                    |
| 318   | -4.984                                | -13.570                               | -0.027                                             |
| 328   | -4.714                                |                                       |                                                    |

2. FiguresS1-S4

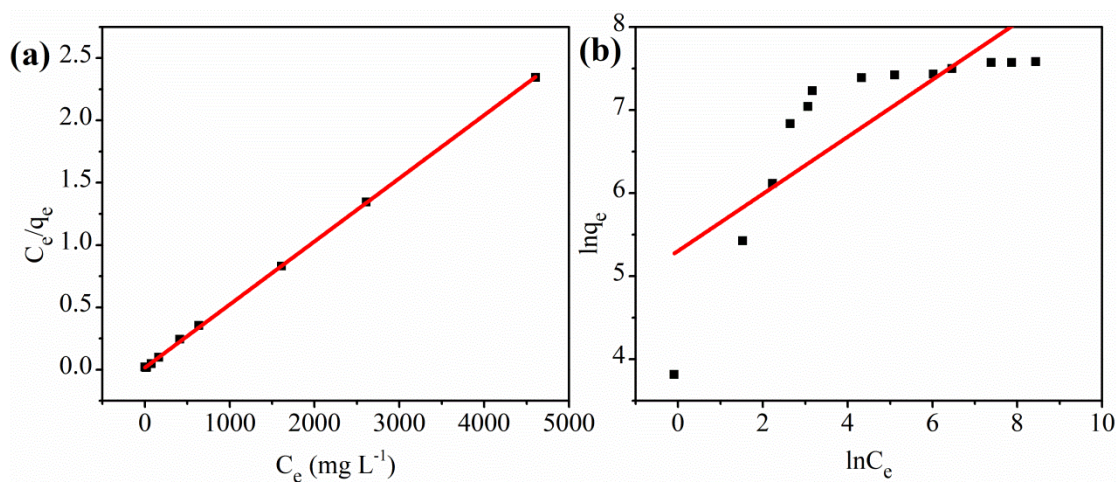

Fig.S1 Adsorption of Pb (II) on Ma-COM, (a) Langmuir model, (b) Freundlich model.

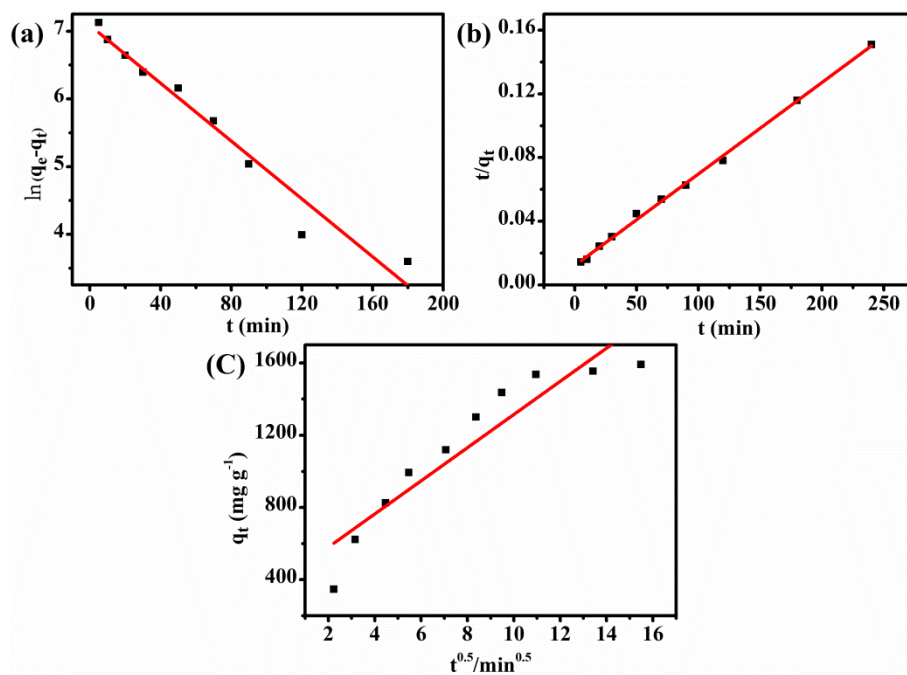

**Fig. S2** Adsorption kinetics curves of Pb(II) on Ma-COM. (a) pseudo-first-order model, (b) pseudo-second-order model and (c) intraparticle diffusion model. Initial Pb(II) concentration: 500 mg L<sup>-1</sup>; time:240 min; pH: 4.0; adsorbent dose: 200 mg L<sup>-1</sup>; temperature: 25 °C.

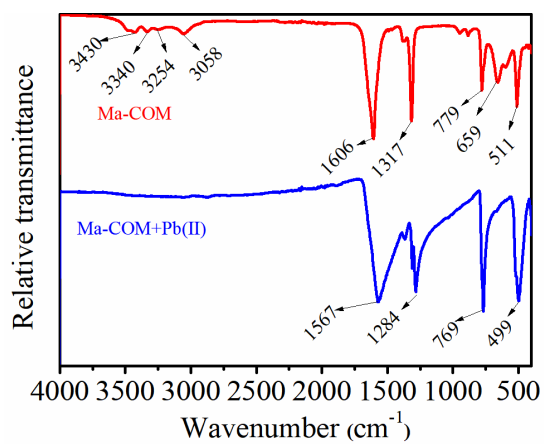

**Fig. S3** FTIR spectra of Ma-COM and Pb (II) solution treated Ma-COM.

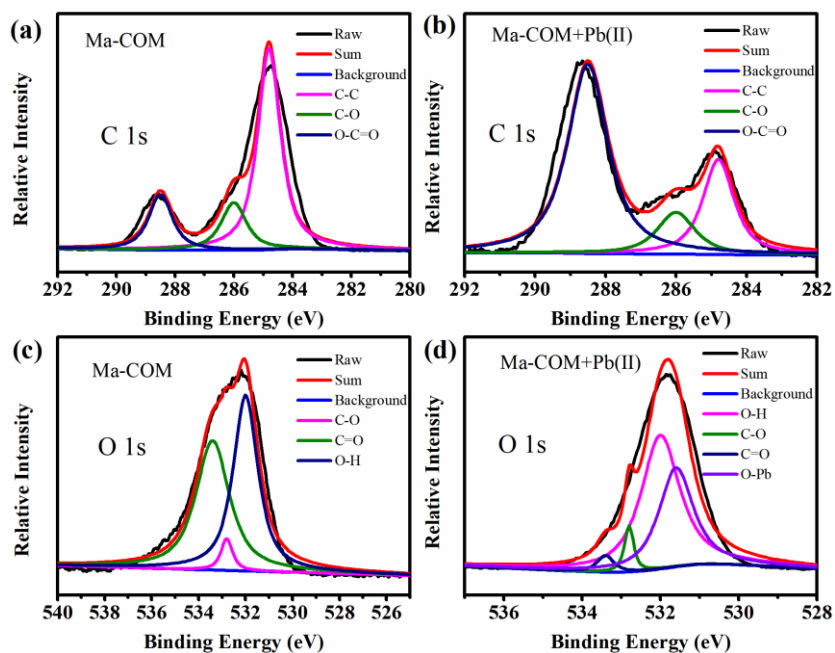

**Fig. S4** XPS spectra of C 1s(a), O 1s(c) of Ma-COM before Pb(II) adsorption, and C 1s(b), O 1s(d) after Pb(II) adsorption.
